# Supplementary material for: Tracing nitrate sources with dual isotopes and long term monitoring of nitrogen species in the Yellow River, China
Source: PubMed Central journal article supplement (PMC5561216; doi:10.1038/s41598-017-08756-7), 2017-08-17
Supplement: 41598_2017_8756_MOESM1_ESM.pdf [file 41598_2017_8756_MOESM1_ESM.pdf]

## Supplementary Information *for*

# Tracing nitrate sources with dual isotopes and long term monitoring of nitrogen species in the Yellow River, China

**Authors:** Fu-Jun Yue, Si-Liang Li\*, Cong-Qiang Liu\*, Zhi-Qi Zhao, Hu Ding

\*Si-Liang Li ([siliang.li@tju.edu.cn](mailto:siliang.li@tju.edu.cn))

### Contents:

1. Supplementary tables
  - 1.1. Supplementary Table S1
  - 1.2. Supplementary Table S2
  - 1.3. Supplementary Table S3
2. Supplementary figures
  - 2.1. Supplementary Figures S1
  - 2.2. Supplementary Figures S2
3. Supplementary Equations
4. Supplementary References

## 1. Supplementary Tables:

### 1.1 Supplementary Table S1

Table S1 The statistics of weekly  $[\text{NH}_4^+\text{-N}]$  for nine stations

| $[\text{NH}_4^+\text{-N}]$<br>(mg/L) | M3   | M5   | M6   | M7   | M10  | M16  | M23  | T9   | T12  |
|--------------------------------------|------|------|------|------|------|------|------|------|------|
| Number                               | 620  | 609  | 618  | 619  | 611  | 619  | 617  | 541  | 567  |
| Min.                                 | 0.02 | 0.06 | 0.06 | 0.01 | 0.02 | 0.03 | 0.01 | 0.19 | 0.14 |
| Max.                                 | 0.61 | 1.41 | 3.66 | 4.24 | 2.96 | 1.81 | 1.88 | 60.7 | 17.6 |
| Ave.                                 | 0.17 | 0.27 | 0.75 | 0.64 | 0.58 | 0.38 | 0.28 | 14.4 | 3.71 |
| Med.                                 | 0.14 | 0.23 | 0.55 | 0.41 | 0.40 | 0.24 | 0.23 | 14.0 | 2.58 |
| Std.                                 | 0.13 | 0.15 | 0.65 | 0.59 | 0.50 | 0.36 | 0.20 | 8.59 | 3.26 |

### 1.2 Supplementary Table S2

Table S2 The isotopic composition of various nitrogen sources.

| Endmember                            | Reference             |                                        | Study area            |                                        |        |
|--------------------------------------|-----------------------|----------------------------------------|-----------------------|----------------------------------------|--------|
|                                      | $\delta^{15}\text{N}$ | $\delta^{18}\text{O}_{\text{nitrate}}$ | $\delta^{15}\text{N}$ | $\delta^{18}\text{O}_{\text{nitrate}}$ | number |
| Nitrate fertilizer <sup>1</sup>      |                       | 17~25                                  |                       |                                        |        |
| Reduce fertilizer <sup>1</sup>       | -8~7                  |                                        | -0.3                  |                                        | 2      |
| Soil organic nitrogen <sup>1,2</sup> | 2~8                   |                                        | 3.4 <sup>3</sup>      |                                        | 5      |
| Atmospheric nitrate <sup>1,2</sup>   | -13~13                | 25~94                                  | -4.4                  | 60.4                                   | 2      |
| Sewage waste <sup>4-6</sup>          | 4.3~29.9              | -4.9~9.4                               | 13.8                  | 0.1                                    | 1      |

### 1.3 Supplementary Table S3

Table S3 The characteristics of three sections in Yellow River

| Stream     | Sites   | Length | Area                       | Area proportion | T                  | Rainfall | Population density <sup>7</sup> |
|------------|---------|--------|----------------------------|-----------------|--------------------|----------|---------------------------------|
|            |         | km     | $\times 10^5 \text{ km}^2$ | %               | $^{\circ}\text{C}$ | mm       | person/ $\text{km}^2$           |
| Upstream   | M1-M9   | 3472   | 4.28                       | 53.8            | 1-8                | 390      | 47.2                            |
| Midstream  | M9-M18  | 1206   | 3.44                       | 43.3            | 8-14               | 517      | 143.0                           |
| Downstream | M18-M26 | 786    | 0.23                       | 2.9             | 12-14              | 651      | 4717.4                          |

## 2. Supplementary Figures:

### 2.1. Supplementary Figure S1

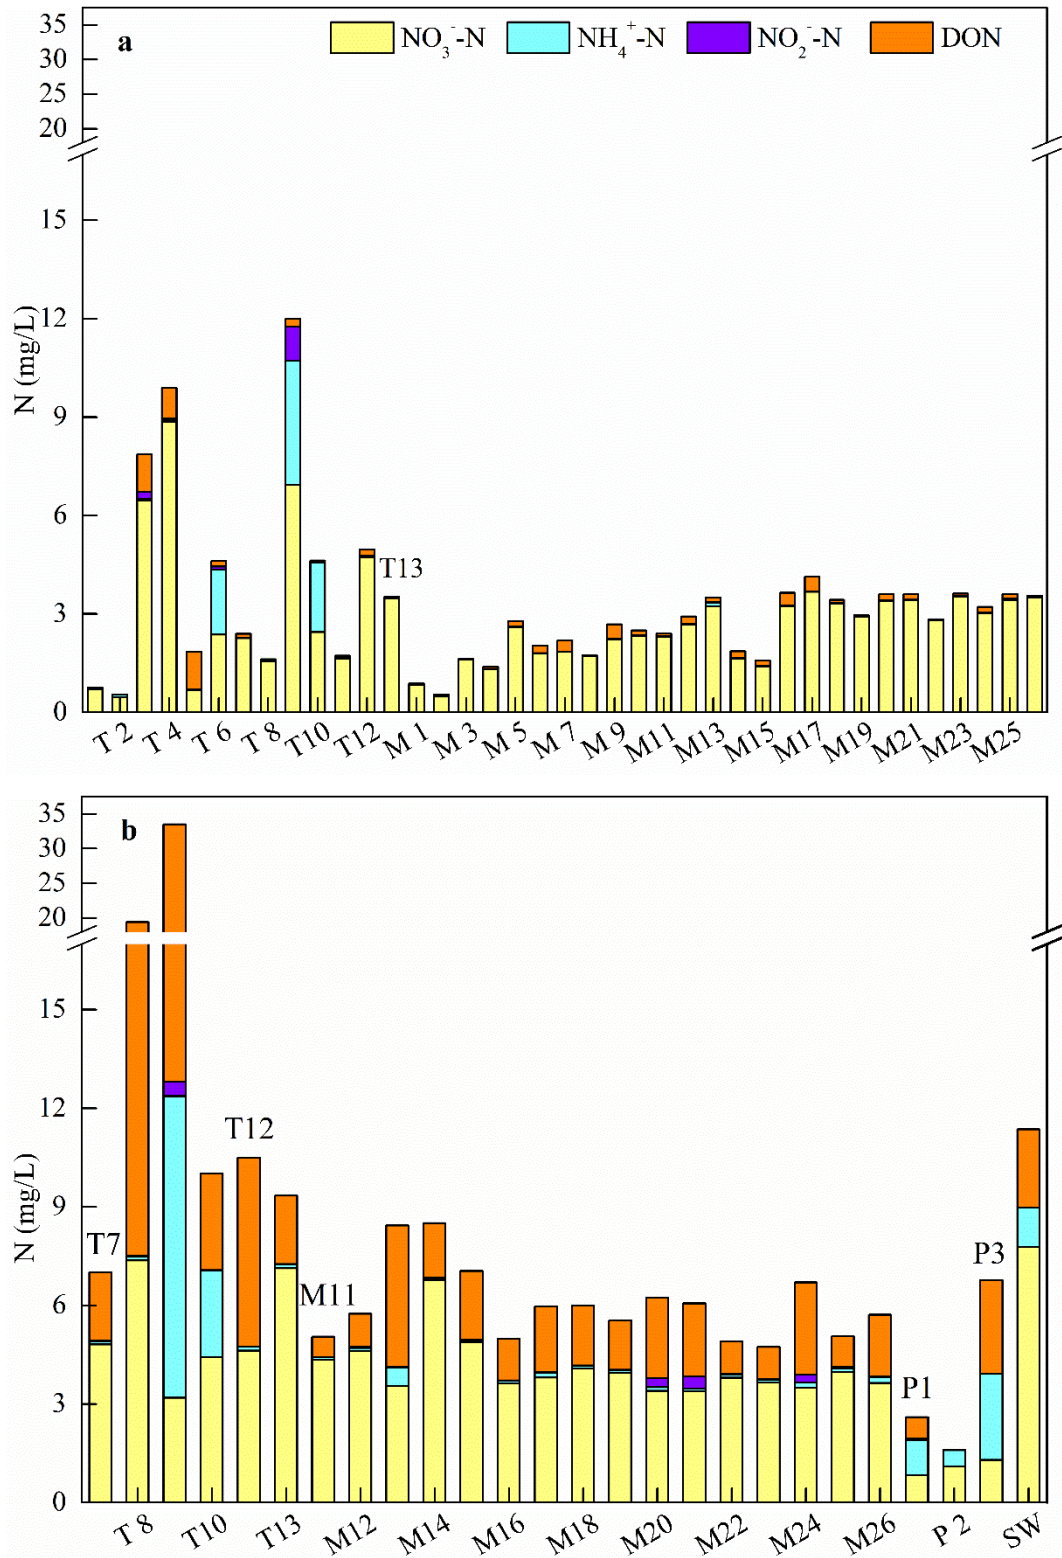

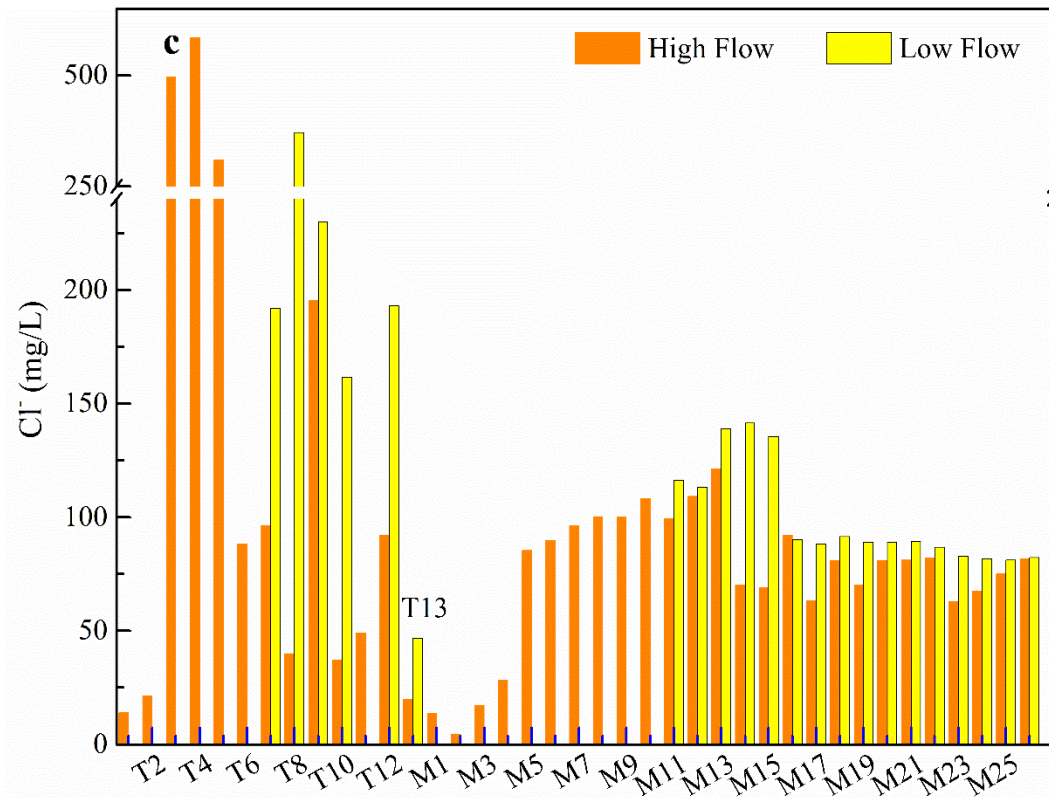

Figure S1. The concentrations of N-species in Yellow River and its tributaries during the high (a) flow season, (b) low flow season. (b included precipitation (P1-P3) and sewage waste (SW) samples) and (c) seasonal Cl<sup>-</sup> concentration. Figures were produced using OriginPro 8.5 (<http://www.originlab.com/>).

2.2 Supplementary Figure S2

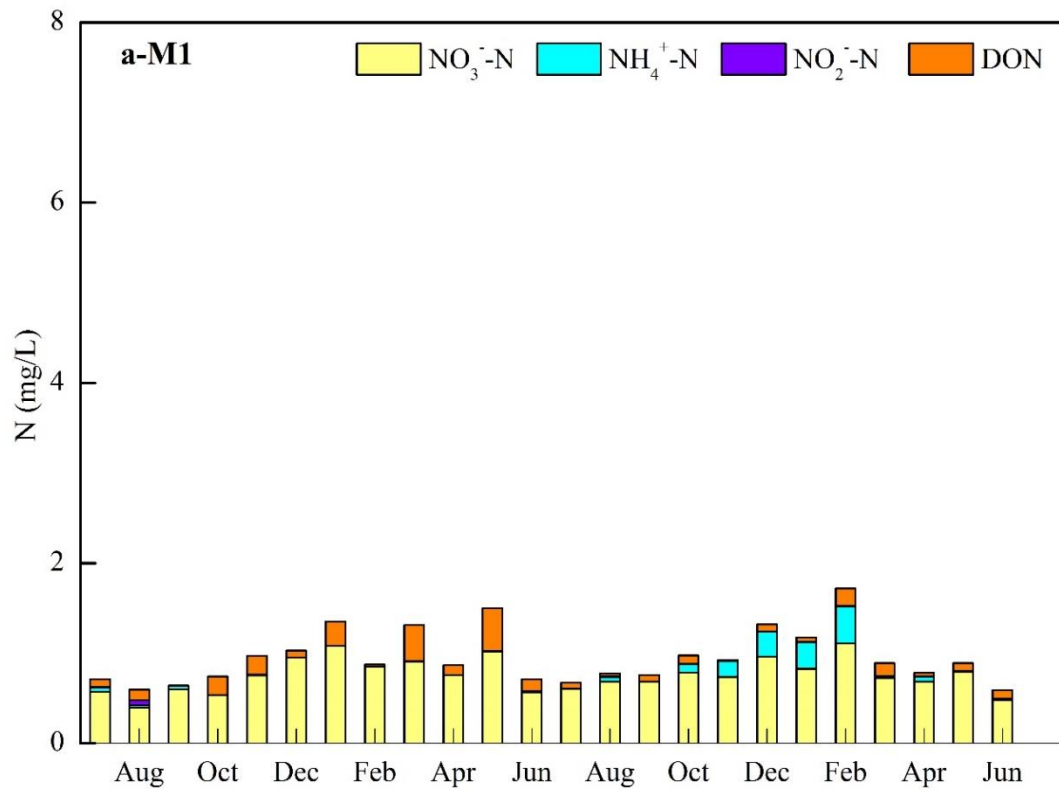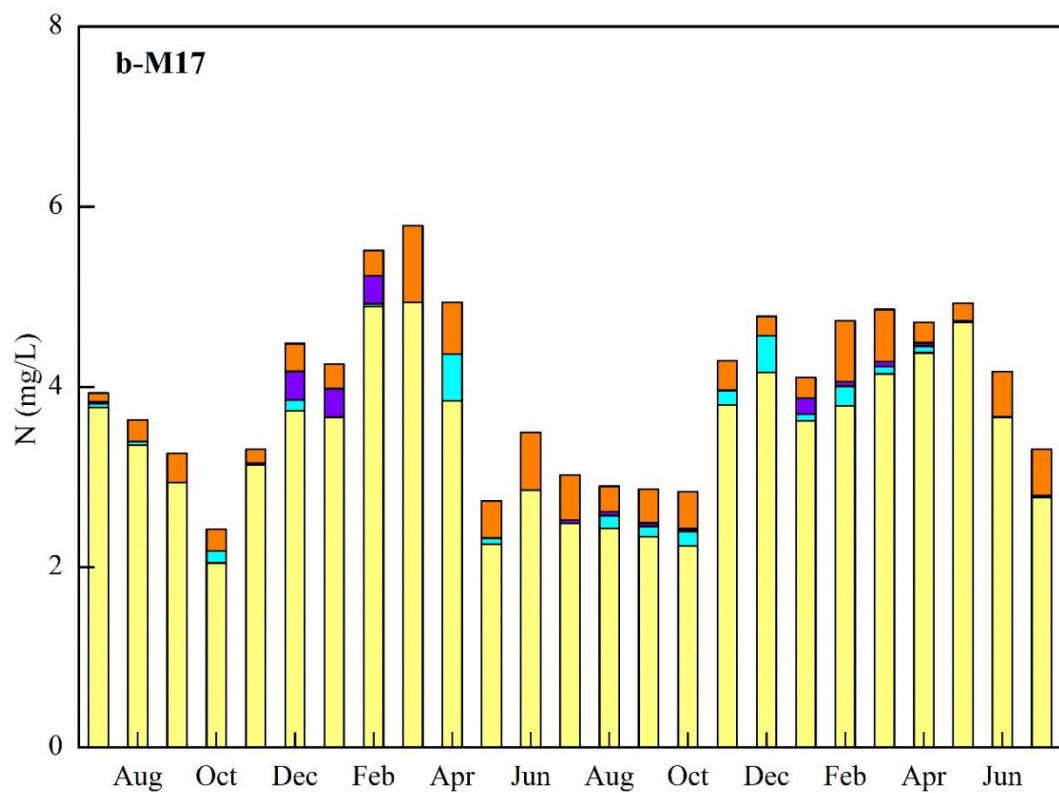

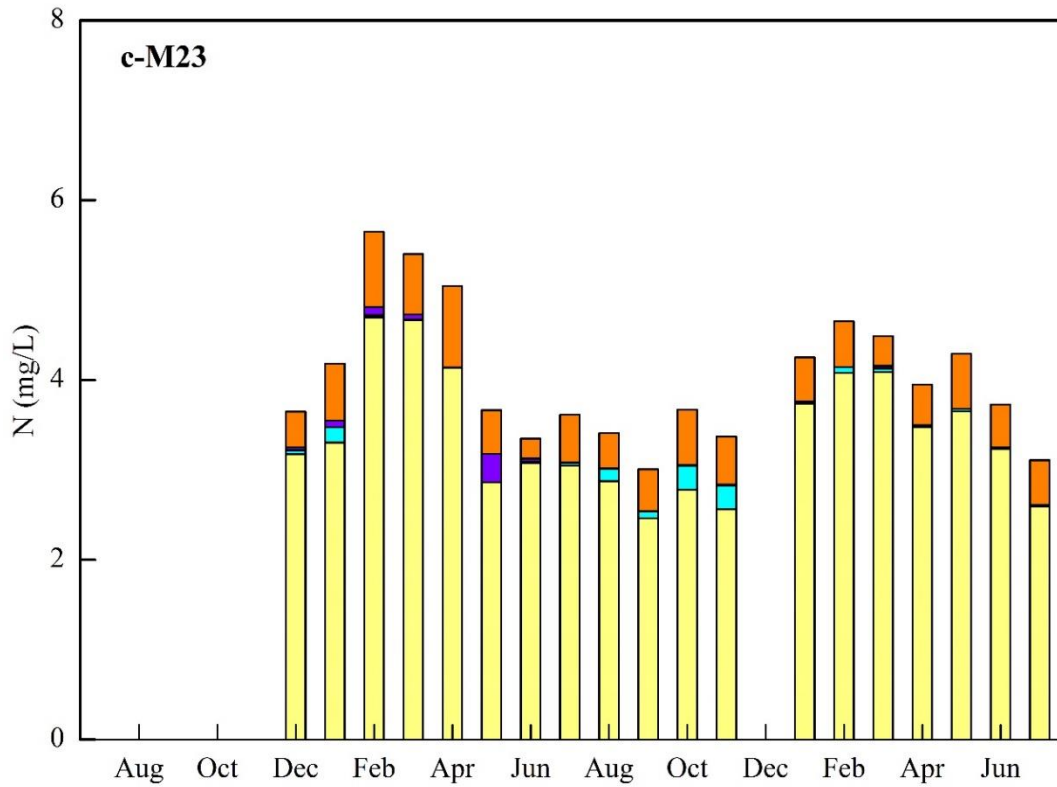

Figure S2 The concentrations of N-species in Yellow River in monthly samples (a) M1, (b) M17 and (c) M23. Figures were produced using OriginPro 8.5 (<http://www.originlab.com/>).

### 3 Supplementary Equations

To estimate the contribution of the nitrate sources to the Yellow River a mixing-model based on mass balance equations was used. The model only roughly considers nitrate contributions from only two sampled sources: atmospheric deposition (A) and nitrate originated from nitrification (N). The equations are

$$\delta^{18}\text{O}_Y = f_A \times \delta^{18}\text{O}_A + f_N \times \delta^{18}\text{O}_N \quad (1)$$

$$1 = f_A + f_N \quad (2)$$

The subscripts A and N represent: atmospheric deposition (A) and nitrate originated from nitrification (N), Y represents the Yellow River. f is defined as the fraction of the respective source.

#### 4 Supplementary References

- 1 Kendall, C., Elliott, E. M. & Wankel, S. D. Tracing anthropogenic inputs of nitrogen to ecosystems. *Stable isotopes in ecology and environmental science*, 375-449 (2007).
- 2 Xue, D. M. *et al.* Present limitations and future prospects of stable isotope methods for nitrate source identification in surface- and groundwater. *Water Res.* **43**, 1159-1170, (2009).
- 3 Li, L. B. *Isotope geochemistry of soil carbon and nitrogen in typical soil types in Guizhou karstic and Loess Plateau areas* Doctor thesis, University of Chinese Academy of Sciences, (2012).
- 4 Li, S. L. *et al.* Assessment of the sources of nitrate in the Changjiang River, China using a nitrogen and oxygen isotopic approach. *Environ. Sci. Technol.* **44**, 1573-1578, (2010).
- 5 Widory, D., Petelet-Giraud, E., Negrel, P. & Ladouche, B. Tracking the sources of nitrate in groundwater using coupled nitrogen and boron isotopes: A synthesis. *Environ. Sci. Technol.* **39**, (2005).
- 6 Yue, F. J., Li, S. L., Liu, C. Q., Zhao, Z. Q. & Hu, J. Using dual isotopes to evaluate sources and transformation of nitrogen in the Liao River, northeast China. *Appl. Geochem.* **36**, 1-9, (2013).
- 7 Kusuda, T. *The Yellow River: Water and Life*. (World Scientific, 2010).
